# Supplementary material for: Chemical and Mechanical Characterization of Unprecedented Transparent Epoxy–Nanomica Composites—New Model Insights for Mechanical Properties
Source: MDPI journal article supplement (doi:10.3390/polym15061456), 2023-03-15

## **Supplementary Information**

### **Chemical and mechanical characterization of unprecedented transparent epoxy-nan mica-composites. New model insights for mechanical properties**

Greta Ongaro, Alessandro Pontefisso, Elena Zeni, Francesco Lanero, Alessia Famengo, Federico Zorzi, Mirco Zaccariotto, Ugo Galvanetto, Pietro Fiorentin, Renato Gobbo, Roberta Bertani, Paolo Sgarbossa

#### **List of items:**

- Table S1: Mineralogical composition of micas from XRD data
- Table S2: (a) Composition of Mica 10 by XRF data, (b) Composition of Mica 45 from XRF data
- Table S3: Values of the average transmittance for the tested nanocomposites
- Figure S1: FT IR spectra of Mica 10 and Mica 45 (a) in the 3000-4000 cm<sup>-1</sup> region (b) and in 600-1250 cm<sup>-1</sup> region
- Figure S2: <sup>13</sup>C Solid state NMR spectrum of Mica 45
- Figure S3: Particle size distribution of Mica 10 and Mica 45 powders
- Figure S4: ESEM images at different magnification of the neat epoxy resin and the EM composites
- Figure S5: T<sub>onset</sub> decomposition as function of nominal filler weight percentages for Mica 10 and Mica 45 nanocomposites
- Figure S6: Residual mass (calculated from dry mass) at 700°C as function of nominal filler weight percentages for Mica 10 (void circles) and Mica 45 (full circles) nanocomposites

**Table S1:** Mineralogical composition of micas from XRD data

| Minerals (% wt) | Mica 10 | Mica 45 |
|-----------------|---------|---------|
| Quartz          | 13,1    | 9,9     |
| Muscovite       | 62,7    | 45,1    |
| Albite          | 4,1     | 3,4     |
| Kaolinite       | 14,2    | 33,0    |
| Microcline      | 5,9     | 8,6     |

**Table S2:**

**(a)** Composition of Mica 10 by XRF data

| Element | Weight % | Atomic % |
|---------|----------|----------|
| O       | 46,74    | 61,93    |
| Na      | 0,48     | 0,44     |
| Mg      | 0,72     | 0,69     |
| Al      | 17,47    | 13,72    |
| Si      | 24,57    | 18,55    |
| K       | 7,63     | 4,13     |
| Ti      | 0,6      | 0,26     |
| Fe      | 2,52     | 0,95     |

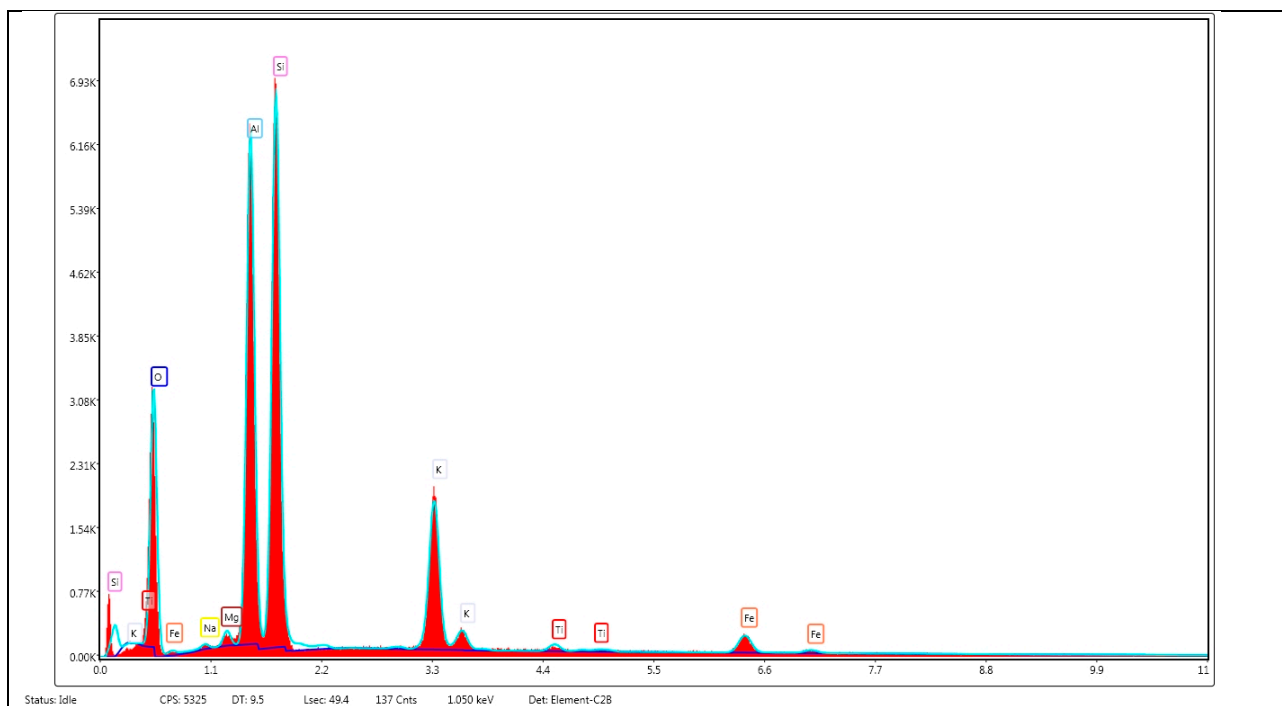

(b) Composition of Mica 45 from XRF data

| Element | Weight % | Atomic % |
|---------|----------|----------|
| Oxygen  | 47,31    | 62,09    |
| Na      | 0,33     | 0,3      |
| Mg      | 0,54     | 0,47     |
| Al      | 18,7     | 14,55    |
| Si      | 24,41    | 18,25    |
| K       | 6,48     | 3,48     |
| Ti      | 0,46     | 0,2      |
| Fe      | 1,78     | 0,67     |

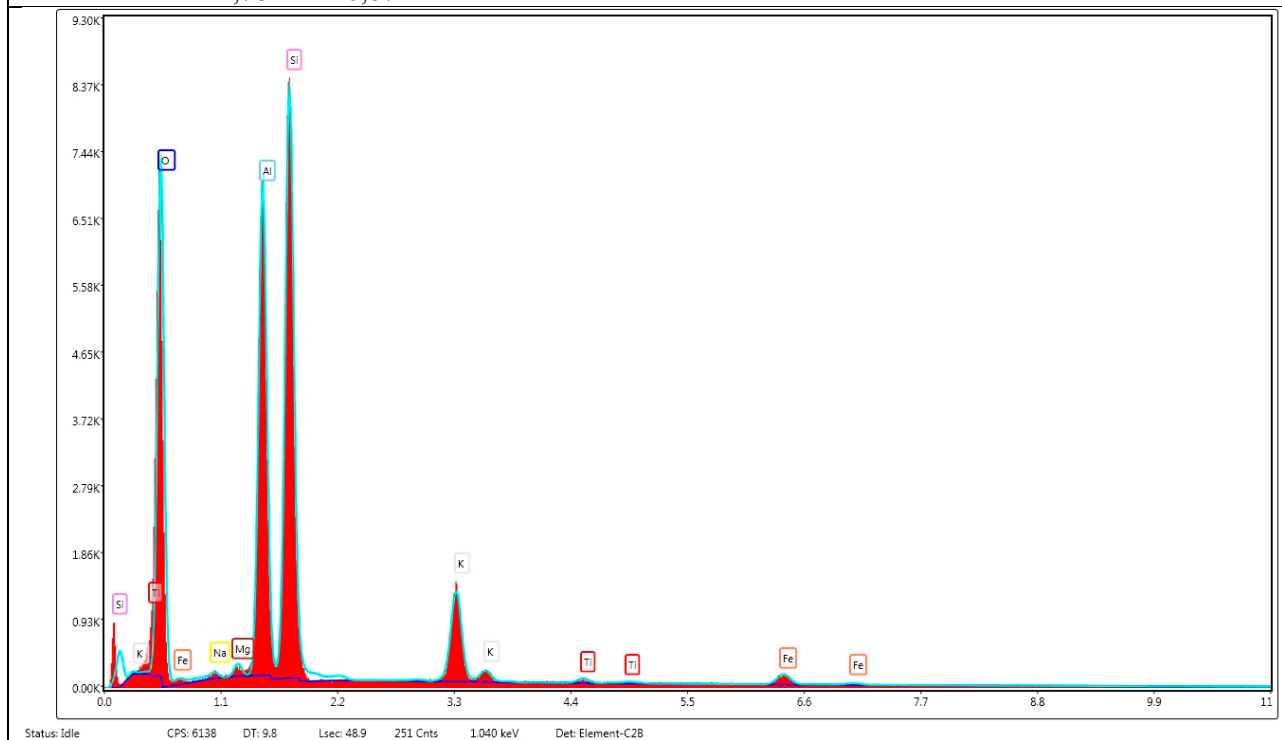

**Table S3:** Values of the average transmittance for the tested nanocomposites

|                | <b>Mica amount (g)</b><br><b>(%wt/wt)</b> | <b>Sample labeling</b> | <b>T ( % )</b> |
|----------------|-------------------------------------------|------------------------|----------------|
| <b>Neat</b>    |                                           |                        | <b>82</b>      |
| <b>Mica 10</b> | 1.6 g (1%)                                | EM10-1                 | <b>77</b>      |
|                | 4.8 g (3%)                                | EM10-3                 | <b>75</b>      |
|                | 8.0 g (5%)                                | EM10-5                 | <b>50</b>      |
| <b>Mica 45</b> | 1.6 g (1%)                                | EM45-1                 | <b>82</b>      |
|                | 4.8 g (3%)                                | EM45-3                 | <b>73</b>      |
|                | 8.0 g (5%)                                | EM45-5                 | <b>70</b>      |

The reported data are the average of two measurements collected under the same conditions.

The data can be compared with those reported in Huang, J; Nie, X. A simple and novel method to design flexible and transparent epoxy resin with tunable mechanical properties. *Polym. Int.* **2016**, *65*, 835-840.

**Figure S1:** FT IR spectra of Mica 10 and Mica 45

**(a)** in the 3000-4000  $\text{cm}^{-1}$  region

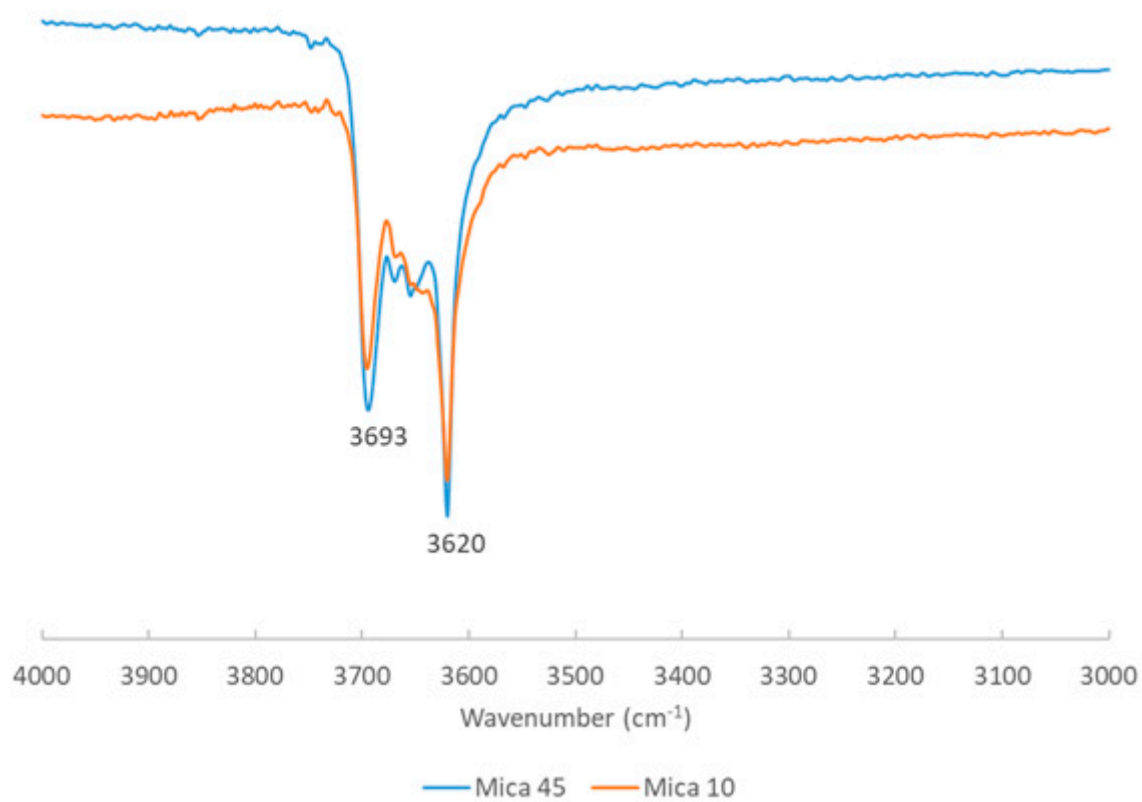

**(b)** and in 600-1250  $\text{cm}^{-1}$  region

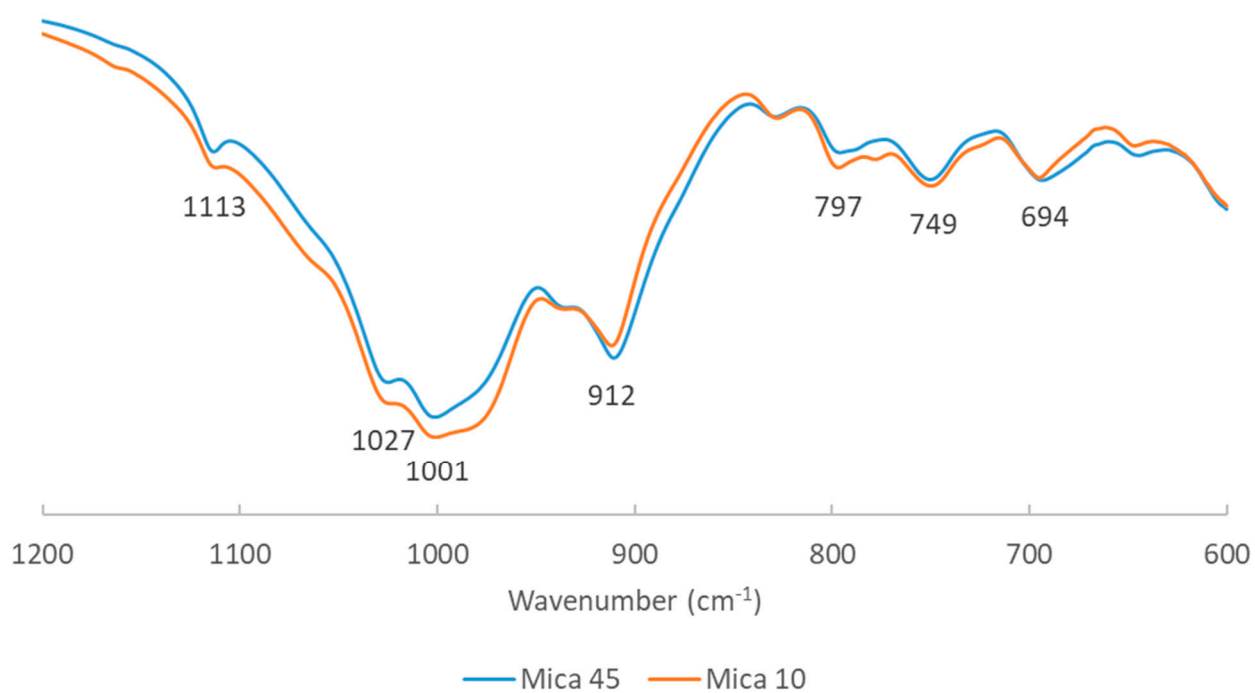

**Figure S2:**  $^{13}\text{C}$  Solid state NMR spectrum of Mica 45

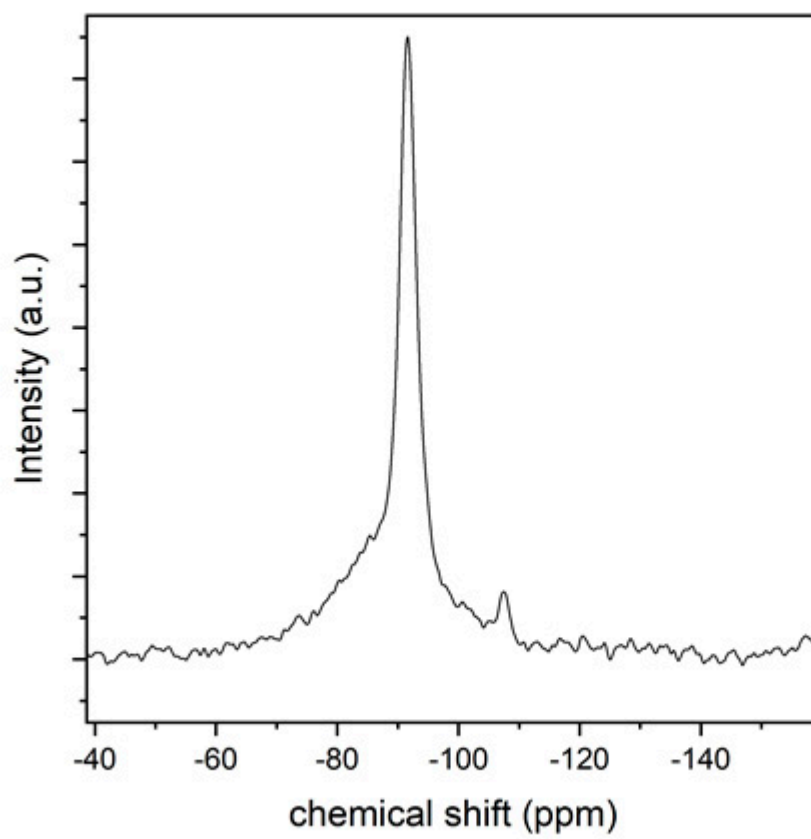

**Figure S3: Particle size distribution of Mica 10 and Mica 45 powders**

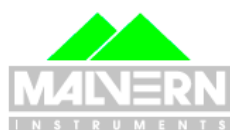

MASTERSIZER

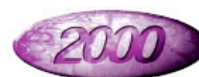

## Result Analysis Report

**Sample Name:**  
MICA 10 - Average

**Sample Source & type:**

**Sample bulk lot ref:**

**SOP Name:**

**Measured by:**  
laboratorio

**Result Source:**  
Averaged

**Measured:**  
venerdì 14 ottobre 2022 08:46:39

**Analysed:**  
venerdì 14 ottobre 2022 08:46:40

**Particle Name:**  
Silica 0.1

**Particle RI:**  
1.544

**Dispersant Name:**  
Ethanol

**Accessory Name:**  
Hydro 2000SM (A)

**Absorption:**  
0.1

**Dispersant RI:**  
1.360

**Analysis model:**  
Multiple narrow modes

**Size range:**  
0.020 to 2000.0...  $\mu\text{m}$

**Weighted Residual:**  
0.996 %

**Sensitivity:**  
Enhanced

**Obscuration:**  
14.50 %

**Result Emulation:**  
Off

**Concentration:**  
0.0117 %Vol

**Span :**  
1.604

**Uniformity:**  
0.506

**Result units:**  
Volume

**Specific Surface Area:**  
1.2  $\text{m}^2/\text{g}$

**Surface Weighted Mean D[3,2]:**  
4.984  $\mu\text{m}$

**Vol. Weighted Mean D[4,3]:**  
9.304  $\mu\text{m}$

**d(0.1):** 2.823  $\mu\text{m}$

**d(0.5):** 8.539  $\mu\text{m}$

**d(0.9):** 16.521  $\mu\text{m}$

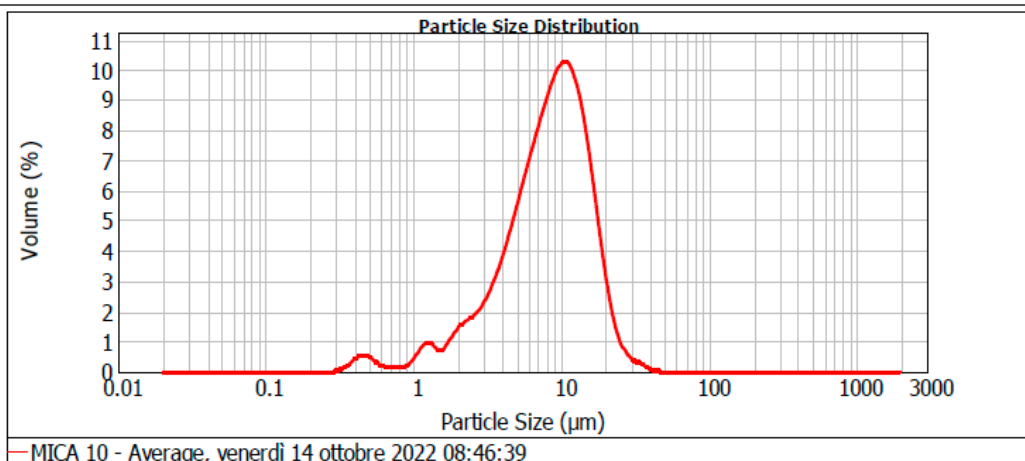

| Size ( $\mu\text{m}$ ) | Volume In % | Size ( $\mu\text{m}$ ) | Volume In % | Size ( $\mu\text{m}$ ) | Volume In % | Size ( $\mu\text{m}$ ) | Volume In % | Size ( $\mu\text{m}$ ) | Volume In % | Size ( $\mu\text{m}$ ) | Volume In % |
|------------------------|-------------|------------------------|-------------|------------------------|-------------|------------------------|-------------|------------------------|-------------|------------------------|-------------|
| 0.010                  | 0.00        | 0.105                  | 0.00        | 1.098                  | 0.79        | 11.482                 | 8.83        | 120.226                | 0.00        | 1258.925               | 0.00        |
| 0.011                  | 0.00        | 0.120                  | 0.00        | 1.259                  | 0.80        | 13.183                 | 7.67        | 138.038                | 0.00        | 1445.440               | 0.00        |
| 0.013                  | 0.00        | 0.138                  | 0.00        | 1.445                  | 0.63        | 15.136                 | 5.94        | 158.489                | 0.00        | 1659.587               | 0.00        |
| 0.015                  | 0.00        | 0.158                  | 0.00        | 1.660                  | 0.96        | 17.378                 | 3.92        | 181.970                | 0.00        | 1905.461               | 0.00        |
| 0.017                  | 0.00        | 0.182                  | 0.00        | 1.905                  | 1.33        | 19.853                 | 2.18        | 208.930                | 0.00        | 2187.762               | 0.00        |
| 0.020                  | 0.00        | 0.209                  | 0.00        | 2.188                  | 1.56        | 22.909                 | 1.03        | 239.883                | 0.00        | 2511.886               | 0.00        |
| 0.023                  | 0.00        | 0.240                  | 0.00        | 2.512                  | 1.80        | 26.303                 | 0.47        | 275.423                | 0.00        | 2884.032               | 0.00        |
| 0.026                  | 0.00        | 0.275                  | 0.02        | 2.884                  | 2.22        | 30.200                 | 0.28        | 316.228                | 0.00        | 3311.311               | 0.00        |
| 0.030                  | 0.00        | 0.316                  | 0.14        | 3.311                  | 2.83        | 34.674                 | 0.14        | 363.078                | 0.00        | 3801.894               | 0.00        |
| 0.035                  | 0.00        | 0.363                  | 0.33        | 3.802                  | 3.60        | 39.811                 | 0.02        | 416.869                | 0.00        | 4365.158               | 0.00        |
| 0.040                  | 0.00        | 0.417                  | 0.49        | 4.365                  | 4.53        | 45.709                 | 0.00        | 478.630                | 0.00        | 5011.872               | 0.00        |
| 0.046                  | 0.00        | 0.479                  | 0.41        | 5.012                  | 5.51        | 52.481                 | 0.00        | 549.541                | 0.00        | 5754.399               | 0.00        |
| 0.052                  | 0.00        | 0.550                  | 0.20        | 5.754                  | 6.50        | 60.256                 | 0.00        | 630.957                | 0.00        | 6606.934               | 0.00        |
| 0.060                  | 0.00        | 0.631                  | 0.13        | 6.607                  | 7.43        | 69.183                 | 0.00        | 724.436                | 0.00        | 7585.776               | 0.00        |
| 0.069                  | 0.00        | 0.724                  | 0.11        | 7.586                  | 8.31        | 79.433                 | 0.00        | 831.764                | 0.00        | 8709.636               | 0.00        |
| 0.079                  | 0.00        | 0.832                  | 0.17        | 8.710                  | 9.00        | 91.201                 | 0.00        | 954.993                | 0.00        | 10000.000              | 0.00        |
| 0.091                  | 0.00        | 0.955                  | 0.44        | 10.000                 | 9.26        | 104.713                | 0.00        | 1096.478               | 0.00        |                        |             |
| 0.105                  | 0.00        | 1.098                  |             | 11.482                 |             | 120.226                |             | 1258.925               |             |                        |             |

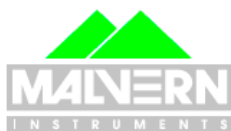

# MASTERSIZER

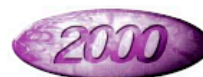

## Result Analysis Report

Sample Name:  
MICA 145 - Average

SOP Name:

Measured:  
venerdì 14 ottobre 2022 08:58:38

Sample Source & type:

Measured by:  
laboratorio

Analysed:  
venerdì 14 ottobre 2022 08:58:39

Sample bulk lot ref:

Result Source:  
Averaged

Particle Name:  
Silica 0.1

Accessory Name:  
Hydro 2000SM (A)

Analysis model:  
Multiple narrow modes

Sensitivity:  
Enhanced

Particle RI:  
1.544

Absorption:  
0.1

Size range:  
0.020 to 2000.0...  $\mu\text{m}$

Obscuration:  
15.69 %

Dispersant Name:  
Ethanol

Dispersant RI:  
1.360

Weighted Residual:  
0.630 %

Result Emulation:  
Off

Concentration:  
0.0268 %Vol

Span :  
1.938

Uniformity:  
0.621

Result units:  
Volume

Specific Surface Area:  
0.51  $\text{m}^2/\text{g}$

Surface Weighted Mean D[3,2]:  
11.776  $\mu\text{m}$

Vol. Weighted Mean D[4,3]:  
22.185  $\mu\text{m}$

d(0.1): 5.963  $\mu\text{m}$

d(0.5): 18.616  $\mu\text{m}$

d(0.9): 42.049  $\mu\text{m}$

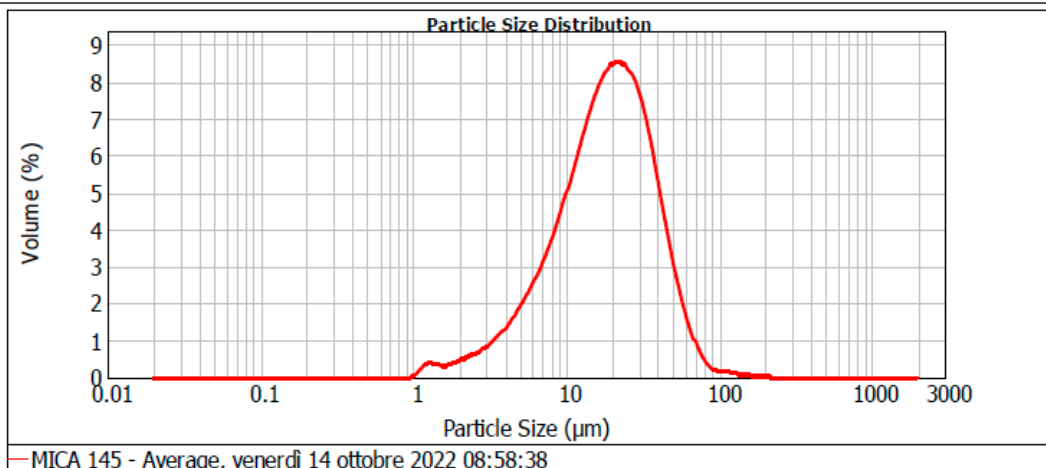

| Size ( $\mu\text{m}$ ) | Volume In % | Size ( $\mu\text{m}$ ) | Volume In % | Size ( $\mu\text{m}$ ) | Volume In % | Size ( $\mu\text{m}$ ) | Volume In % | Size ( $\mu\text{m}$ ) | Volume In % | Size ( $\mu\text{m}$ ) | Volume In % |
|------------------------|-------------|------------------------|-------------|------------------------|-------------|------------------------|-------------|------------------------|-------------|------------------------|-------------|
| 0.010                  | 0.00        | 0.106                  | 0.00        | 1.098                  | 0.30        | 11.482                 | 5.70        | 120.226                | 0.10        | 1258.925               | 0.00        |
| 0.011                  | 0.00        | 0.120                  | 0.00        | 1.259                  | 0.34        | 13.183                 | 6.48        | 138.038                | 0.06        | 1445.440               | 0.00        |
| 0.013                  | 0.00        | 0.138                  | 0.00        | 1.445                  | 0.29        | 15.136                 | 7.11        | 158.489                | 0.04        | 1659.587               | 0.00        |
| 0.015                  | 0.00        | 0.158                  | 0.00        | 1.660                  | 0.34        | 17.378                 | 7.53        | 181.970                | 0.03        | 1905.461               | 0.00        |
| 0.017                  | 0.00        | 0.182                  | 0.00        | 1.905                  | 0.43        | 19.953                 | 7.71        | 208.930                | 0.00        | 2187.762               | 0.00        |
| 0.020                  | 0.00        | 0.209                  | 0.00        | 2.188                  | 0.53        | 22.909                 | 7.62        | 239.883                | 0.00        | 2511.888               | 0.00        |
| 0.023                  | 0.00        | 0.240                  | 0.00        | 2.512                  | 0.63        | 26.303                 | 7.22        | 275.423                | 0.00        | 2884.032               | 0.00        |
| 0.026                  | 0.00        | 0.275                  | 0.00        | 2.884                  | 0.77        | 30.200                 | 6.46        | 316.228                | 0.00        | 3311.311               | 0.00        |
| 0.030                  | 0.00        | 0.316                  | 0.00        | 3.311                  | 0.98        | 34.674                 | 5.39        | 363.078                | 0.00        | 3801.894               | 0.00        |
| 0.035                  | 0.00        | 0.363                  | 0.00        | 3.802                  | 1.25        | 39.811                 | 4.18        | 416.869                | 0.00        | 4365.158               | 0.00        |
| 0.040                  | 0.00        | 0.417                  | 0.00        | 4.365                  | 1.58        | 45.709                 | 2.99        | 478.630                | 0.00        | 5011.872               | 0.00        |
| 0.046                  | 0.00        | 0.479                  | 0.00        | 5.012                  | 1.95        | 52.481                 | 2.01        | 549.541                | 0.00        | 5754.399               | 0.00        |
| 0.052                  | 0.00        | 0.550                  | 0.00        | 5.754                  | 2.36        | 60.256                 | 1.22        | 630.957                | 0.00        | 6606.934               | 0.00        |
| 0.060                  | 0.00        | 0.631                  | 0.00        | 6.607                  | 2.83        | 69.183                 | 0.83        | 724.436                | 0.00        | 7585.776               | 0.00        |
| 0.069                  | 0.00        | 0.724                  | 0.00        | 7.586                  | 3.40        | 79.433                 | 0.28        | 831.764                | 0.00        | 8709.636               | 0.00        |
| 0.079                  | 0.00        | 0.832                  | 0.00        | 8.710                  | 4.09        | 91.201                 | 0.16        | 954.993                | 0.00        | 10000.000              | 0.00        |
| 0.091                  | 0.00        | 0.956                  | 0.05        | 10.000                 | 4.89        | 104.713                | 0.14        | 1096.478               | 0.00        |                        |             |
| 0.105                  | 0.00        | 1.096                  |             | 11.482                 |             | 120.226                |             | 1258.925               | 0.00        |                        |             |

**Figure S4:** ESEM images at different magnification of the neat epoxy resin and the EM composites

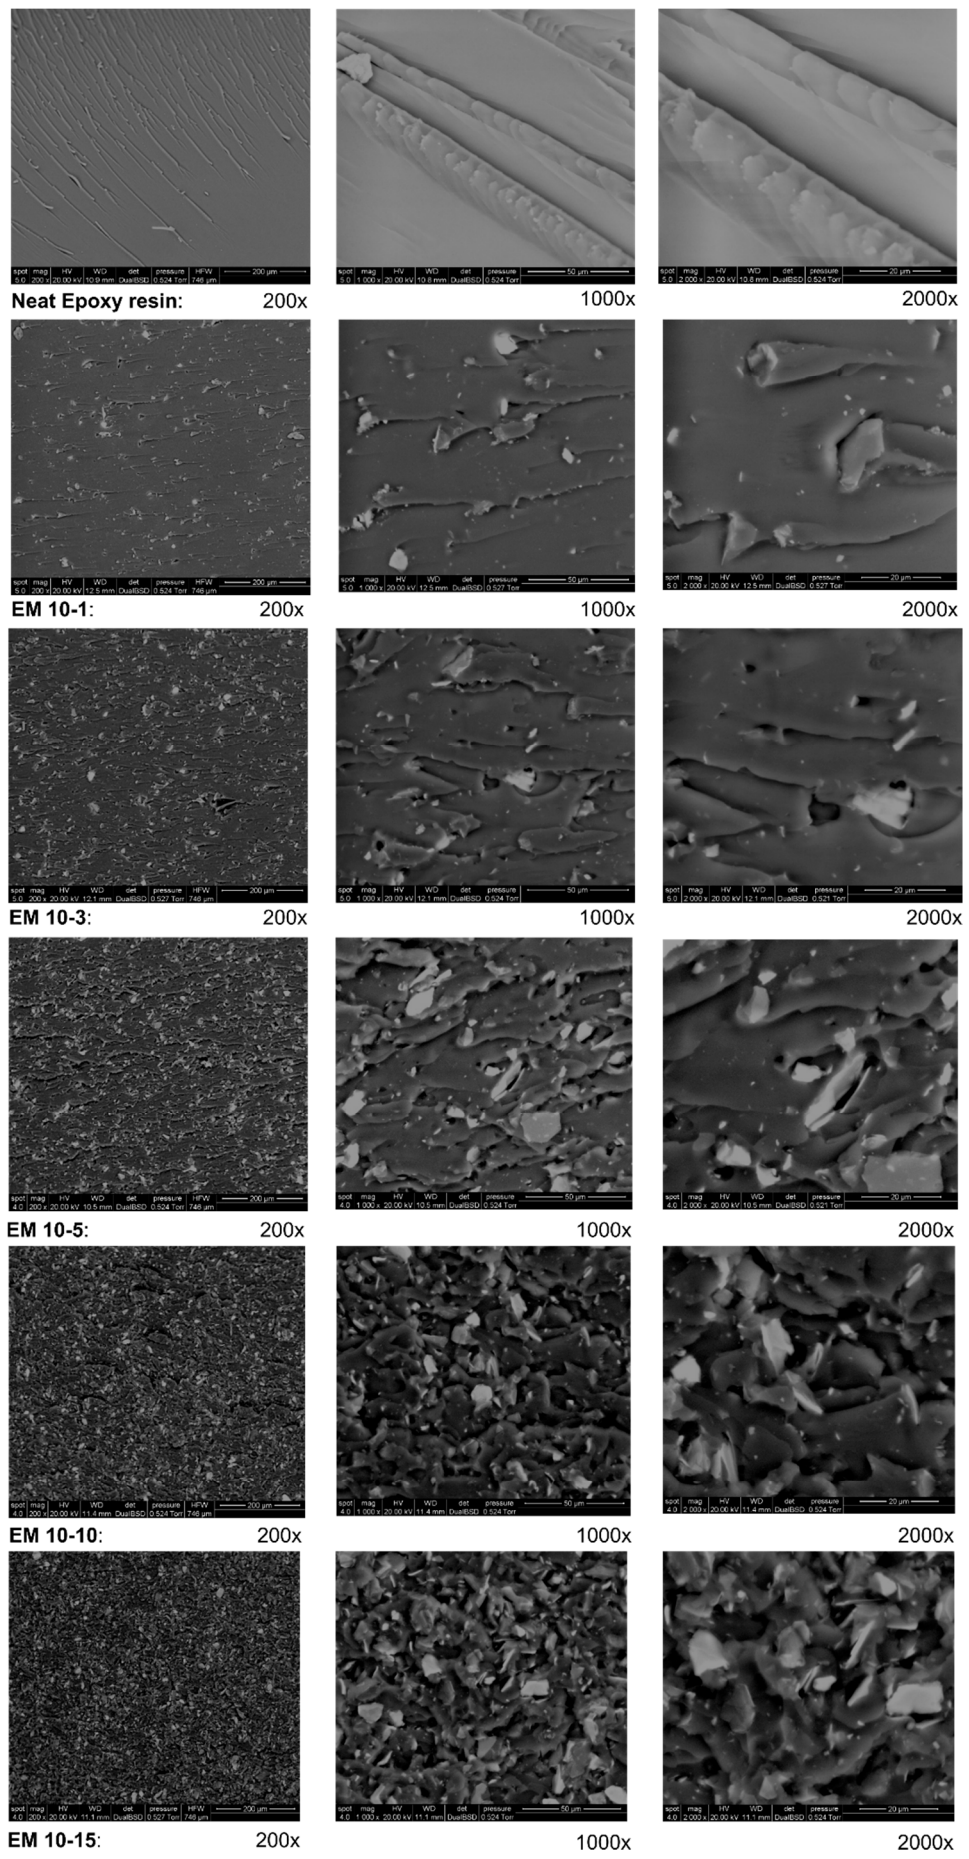



**Figure S5:**  $T_{\text{onset}}$  decomposition as function of nominal filler weight percentages for Mica 10 and Mica 45 nanocomposites

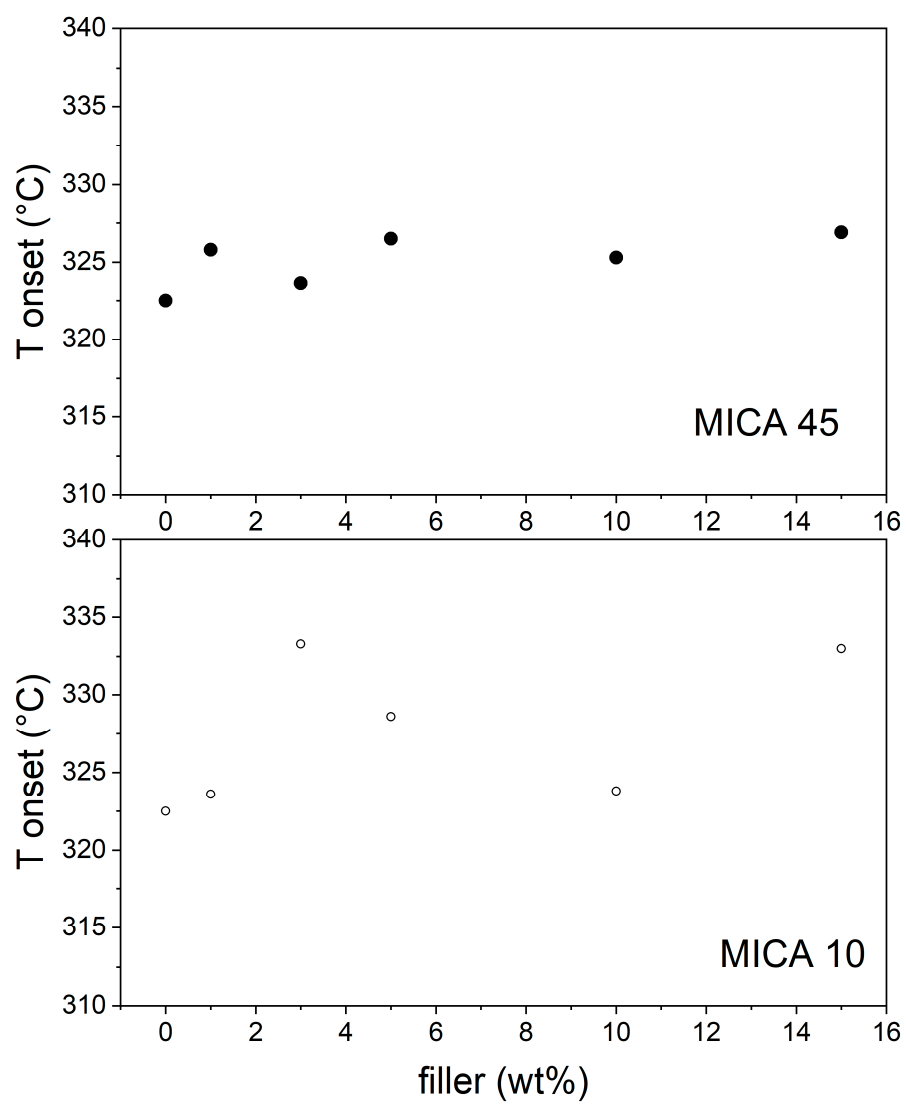

**Figure S6:** Residual mass (calculated from dry mass) at 700°C as function of nominal filler weight percentages for Mica 10 (void circles) and Mica 45 (full circles) nanocomposites

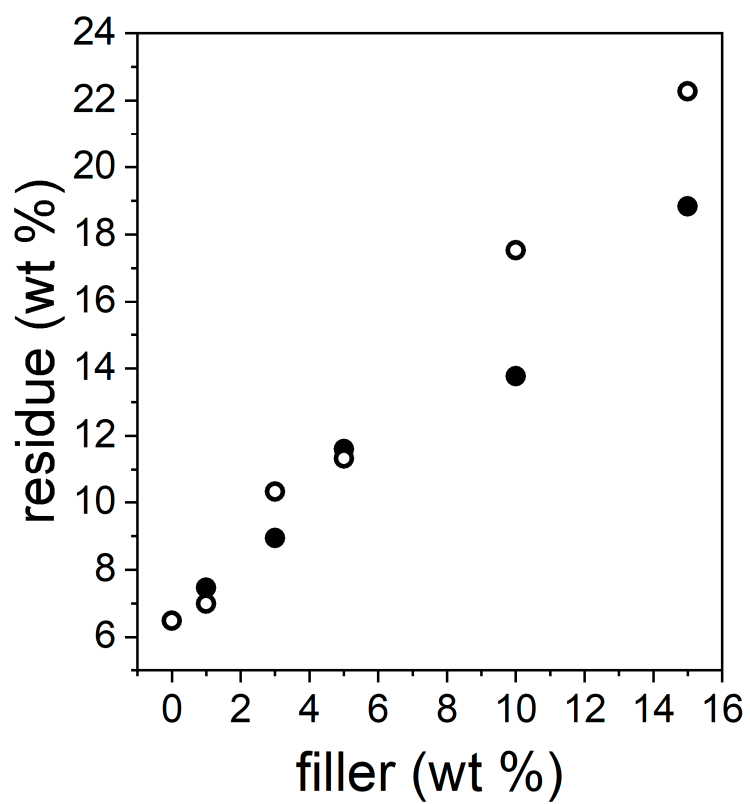

Supplement: s1 [file s1]
